31. Eger EI II, Hylton RR, Irwin RH, Guadagni N: Anesthetic flow meter sequence—A cause for hypoxia. *ANESTHESIOLOGY* 1963; 24:396-7
32. Dwyer R, Bennett HL, Eger EI II, Peterson N: Isoflurane anesthesia prevents unconscious learning. *Anesth Analg* 1992; 75:107-12
33. Dwyer R, Bennett HL, Eger EI II, Heilbron D: Effects of isoflurane and nitrous oxide in subanesthetic concentrations on memory and responsiveness in volunteers. *ANESTHESIOLOGY* 1992; 77:888-98
34. Levinson BW: States of awareness during general anaesthesia. *Br J Anaesth* 1965; 37:544-6
35. Chortkoff BS, Gonsowski CT, Bennett HL, Levinson B, Crankshaw DP, Dutton RC, Ionescu P, Block RI, Eger EI II: Subanesthetic concentrations of desflurane and propofol suppress recall of emotionally charged information. *Anesth Analg* 1995; 81:728-36
36. Rau V, Iyer SV, Oh I, Chandra D, Harrison N, Eger EI II, Fanselow MS, Homanics GE, Sonner JM: GABAA receptor alpha 4 subunit knockout mice are resistant to the amnesic effect of isoflurane. *Anesth Analg* 2009; 109:1816-21
37. Rau V, Oh I, Laster M, Eger EI II, Fanselow MS: Isoflurane suppresses stress-enhanced fear learning in a rodent model of post-traumatic stress disorder. *ANESTHESIOLOGY* 2009; 110:487-95
38. Wahrenbrock EA, Eger EI II, Laravuso RB, Maruschak G: Anesthetic uptake-of mice and men (and whales). *ANESTHESIOLOGY* 1974; 40:19-23

## ANESTHESIOLOGY REFLECTIONS

## Gailey's 1895 Anesthetic Inhaler

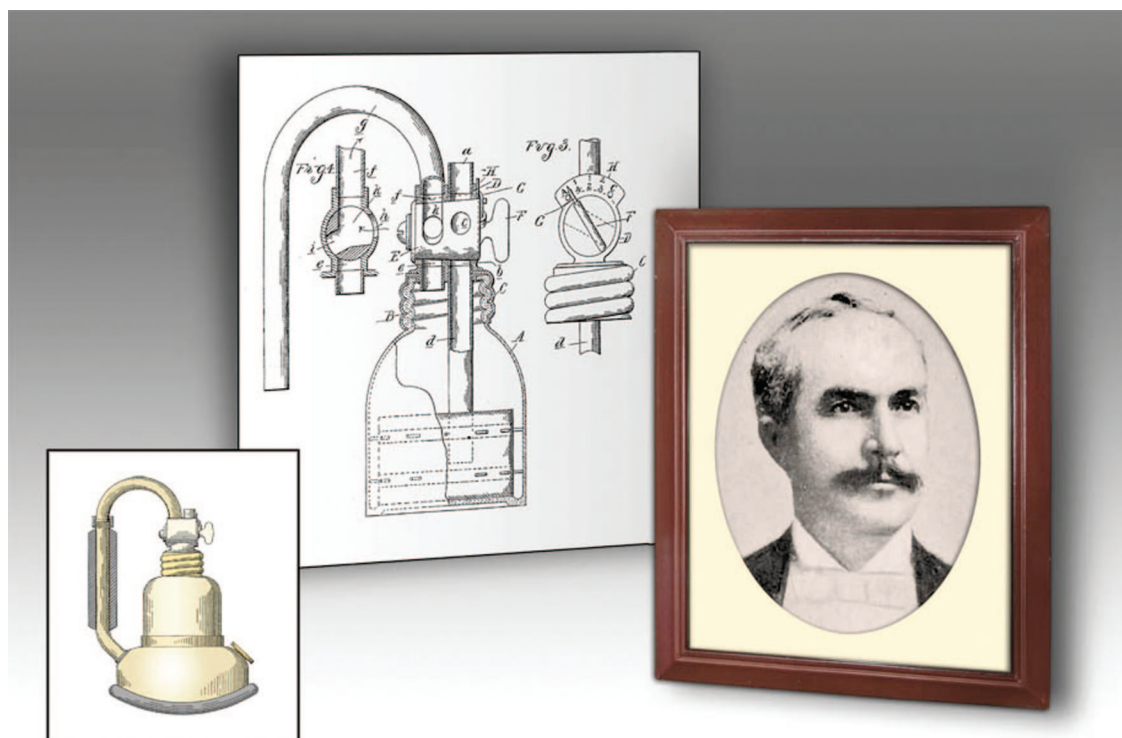

After receiving his B.S. from Michigan Agricultural College and then pursuing preliminary medical studies in Michigan, John Knox Gailey earned his M.D. from the City University of New York. Following postgraduate studies in Europe, Gailey eventually became Chairman of Clinical Surgery at the Detroit College of Medicine. In 1895 Gailey filed for a patent on his "Inhaler" (above, courtesy of the Wood Library-Museum) which incorporated a "respirator-hood and anesthetic vessel in a single structure." Granted one year later, his U.S. Patent No. 552,901 claimed that Gailey's was an anesthetic inhaler using a turn-key valve to dial in room air to mix with anesthetic vapor such that "the strength . . . or the proportion of anesthetic vapor and air can be varied as desired." (Copyright © the American Society of Anesthesiologists, Inc. This image appears in color in the *Anesthesiology Reflections* online collection available at [www.anesthesiology.org](http://www.anesthesiology.org).)

George S. Bause, M.D., M.P.H., Honorary Curator, ASA's Wood Library-Museum of Anesthesiology, Park Ridge, Illinois, and Clinical Associate Professor, Case Western Reserve University, Cleveland, Ohio. UJYC@aol.com.
